# Supplementary material
Source: Elsevier journal article supplement (https://www.sciencedirect.com/science/article/pii/S188898912100032X)
Supplement: mmc1 [file S188898912100032X:mmc1.pdf]

## Supplementary material

### **Title: Population prevalence and incidence of dementia and associated neuropsychiatric symptoms from real-world data.**

#### **Calculation of incidence and prevalence of dementia, and dementia-related NPS.**

Given the dynamic nature of populations with specific health problems, to measure the incidence and prevalence of dementia, and dementia-related NPS, we conducted a retrospective study with two cross-sectional datasets (December 31, 2018, and 2019). By "dynamic population", we mean one in which the members vary over time with individuals entering or leaving as a function of the occurrence of events <sup>22</sup>. In our case, over time, individuals in the population may die, which affects both healthy people (denominator of the incidence rate), and sick people (numerator of the rate). In addition, during the observation period there are also state transitions from healthy to sick. This last factor determines the numerator (incident cases of NPS), and the denominator (incident cases of dementia) of the incidence rate of NPS. The analysis of the status of the entire population at the beginning, and end of 2019 aimed to identify, on the one hand, diagnoses of dementia, and on the other hand, the existence of NPS in those cases of dementia. This analysis allowed us to measure the dynamic components of the population under study to calculate incidence, and prevalence.

The prevalence of dementia disaggregated by age as of December 31, 2019 was calculated by dividing the number of cases by the population obtained from the Basque Institute of Statistics (EUSTAT). The cases identified as of December 31, 2019 that were not present in the 2018 dataset were used as numerator of the incidence of dementia. To calculate the rate per 1000 person-years, the denominator was estimated beginning with the population in 2018 from which we subtracted the years of observation lost due to deaths, and the cases of dementia already identified in 2018 <sup>22,24</sup>. It was assumed that both events occurred uniformly throughout the year, and hence, they were assigned a duration of 0.5 years. The results were validated by comparing them with RWD population, and door-to-door survey data on prevalence <sup>9,25,26</sup>, and incidence <sup>9,11,25,27</sup> in the literature.

### Criteria for the diagnosis of dementia in the population electronic Registry

The search for diagnoses was carried out following validated criteria with a positive predictive value of 95.1% and a negative value of 99.4%. The dementia codes included were in ICD9 (290xx; 2941x; 331xx) and ICD10 (F01.5x; F02.8x; F03.9x; G30.0x; G30.1x; G30.8x; G30.9x; G31.0x; G31.1x; G31.2x; G31.8x; G31.9x). The dementia codes with BPS used were searched in CIE9 (294.11. 290.11. 290.12. 290.13. 290.2x. 290.3. 290.41. 290.42. 290.43. 290.9) and CIE10 (F02.81. F03.90. F05 ). ICD 10 was added to the searches because from 1 January 2016 it is the official ICD. The identification of dementia also included the prescription of specific drugs for Alzheimer's disease (ATC Group N06D) such as acetylcholinesterase inhibitors (donepezil. rivastigmine and galantamine). memantine and rivastigmine.

Table SM1. Sedative capacity of all the drugs included in the dataset.

|                      | ATC     | Drug name       | Sedative capacity (0:absent; 1:minimum; 2:mild; 3:moderate; 4:important) |
|----------------------|---------|-----------------|--------------------------------------------------------------------------|
| Antipsychotic drugs  | N05AA01 | Chlorpromazine  | 3                                                                        |
|                      | N05AA02 | Levomepromazine | 3                                                                        |
|                      | N05AD01 | Haloperidol     | 2                                                                        |
|                      | N05AH02 | Clozapine       | 4                                                                        |
|                      | N05AH03 | Olanzapine      | 3                                                                        |
|                      | N05AH04 | Quetiapine      | 3                                                                        |
|                      | N05AL01 | Sulpiride       | 1                                                                        |
|                      | N05AL03 | Tiapride        | 1                                                                        |
|                      | N05AN01 | Lithium         |                                                                          |
|                      | N05AX08 | Risperidone     | 2                                                                        |
|                      | N05AX12 | Aripiprazole    | 1                                                                        |
|                      | N05AX13 | Paliperidone    | 2                                                                        |
| Antidepressive drugs | N06AA04 | Clomipramine    | 2                                                                        |
|                      | N06AA09 | Amitriptyline   | 2                                                                        |
|                      | N06AA10 | Nortriptyline   | 2                                                                        |
|                      | N06AA21 | Maprotiline     | 2                                                                        |
|                      | N06AB03 | Fluoxetine      | 0                                                                        |
|                      | N06AB04 | Citalopram      | 0                                                                        |
|                      | N06AB05 | Paroxetine      | 0                                                                        |
|                      | N06AB06 | Sertraline      | 0                                                                        |
|                      | N06AB08 | Fluvoxamine     | 1                                                                        |
|                      | N06AB10 | Escitalopram    | 0                                                                        |
|                      | N06AX03 | Mianserin       | 2                                                                        |
|                      | N06AX05 | Trazodone       | 2                                                                        |
|                      | N06AX11 | Mirtazapine     | 2                                                                        |
|                      | N06AX12 | Bupropion       | 0                                                                        |
|                      | N06AX16 | Venlafaxine     | 0                                                                        |
|                      | N06AX21 | Duloxetine      | 0                                                                        |
|                      | N06AX22 | Agomelatine     |                                                                          |
|                      | N06AX23 | Desvenlafaxine  | 0                                                                        |
|                      | N06AX26 | Vortioxetine    | 0                                                                        |

Table SM2. Dementia prevalence with confidence intervals (CI).

| Age group | Prevalence % | Lower CI | Upper CI |
|-----------|--------------|----------|----------|
| Total     | 4.5          | 4.5      | 4.6      |
| [60;65)   | 0.3          | 0.2      | 0.3      |
| [65;70)   | 0.6          | 0.6      | 0.7      |
| [70;75)   | 1.7          | 1.6      | 1.7      |
| [75;80)   | 4.8          | 4.6      | 4.9      |
| [80;85)   | 8.9          | 8.7      | 9.1      |
| [85;90)   | 15.6         | 15.3     | 16.0     |
| [90;105)  | 21.3         | 20.9     | 21.8     |

Table MS3. Dementia incidence with confidence intervals (CI)

| Age group | Numerator | Denominator | Incidence x 1000 | Lower CI | Upper CI |
|-----------|-----------|-------------|------------------|----------|----------|
| Total     | 4,028     | 593,486     | 6.8              | 6.6      | 7.0      |
| [60;65)   | 54        | 144,079     | 0.4              | 0.3      | 0.5      |
| [65;70)   | 123       | 125,316     | 1.0              | 0.8      | 1.2      |
| [70;75)   | 413       | 113,731     | 3.6              | 3.3      | 4.0      |
| [75;80)   | 756       | 79,419      | 9.5              | 8.8      | 10.2     |
| [80;85)   | 1,028     | 62,998      | 16.3             | 15.3     | 17.3     |
| [85;90)   | 1,068     | 44,710      | 23.9             | 22.5     | 25.3     |
| [90;105)  | 586       | 23,234      | 25.2             | 23.2     | 27.3     |

Table MS4. Prevalence of neuropsychiatric symptoms with confidence intervals (CI).

| Psychotic Cluster  | Prevalence (%) | Lower CI | Upper CI |
|--------------------|----------------|----------|----------|
| Total              | 55.4           | 54.8     | 56.0     |
| [60;65)            | 53.3           | 48.3     | 58.3     |
| [65;70)            | 51.9           | 48.4     | 55.4     |
| [70;75)            | 50.6           | 48.4     | 52.8     |
| [75;80)            | 49.9           | 48.3     | 51.4     |
| [80;85)            | 50.9           | 49.7     | 52.1     |
| [85;90)            | 56.0           | 54.9     | 57.0     |
| [90;105)           | 64.8           | 63.6     | 65.9     |
| Depressive Cluster | Prevalence (%) | Lower CI | Upper CI |
| Total              | 68.1           | 67.6     | 68.7     |
| [60;65)            | 78.9           | 74.8     | 82.9     |
| [65;70)            | 75.3           | 72.2     | 78.3     |
| [70;75)            | 73.7           | 71.7     | 75.6     |
| [75;80)            | 75.8           | 74.5     | 77.1     |
| [80;85)            | 74.9           | 73.9     | 76.0     |
| [85;90)            | 66.3           | 65.3     | 67.3     |
| [90;105)           | 55.6           | 54.4     | 56.8     |

Table MS5. Incidence of neuropsychiatric symptoms with confidence intervals (CI)

| Depressive cluster | Numerator | Denominator | Incidence x 100 | Lower CI | Upper CI |
|--------------------|-----------|-------------|-----------------|----------|----------|
| Total              | 3,355     | 9,247       | 36.3            | 35.1     | 37.5     |
| [60;65)            | 48        | 152         | 31.6            | 22.7     | 40.5     |
| [65;70)            | 106       | 299         | 35.4            | 28.7     | 42.2     |
| [70;75)            | 342       | 763         | 44.8            | 40.1     | 49.6     |
| [75;80)            | 698       | 1,168       | 59.8            | 55.3     | 64.2     |
| [80;85)            | 820       | 2,320       | 35.3            | 32.9     | 37.8     |
| [85;90)            | 840       | 2,807       | 29.9            | 27.9     | 32.0     |
| [90;105)           | 501       | 1,738       | 28.8            | 26.3     | 31.3     |
| Psychotic cluster  | Numerator | Denominator | Incidence x 100 | Lower CI | Upper CI |
| Total              | 3,161     | 12,916      | 24.5            | 23.6     | 25.3     |
| [60;65)            | 32        | 332         | 9.6             | 6.3      | 13.0     |
| [65;70)            | 87        | 572         | 15.2            | 12.0     | 18.4     |
| [70;75)            | 248       | 1,416       | 17.5            | 15.3     | 19.7     |
| [75;80)            | 504       | 2,485       | 20.3            | 18.5     | 22.1     |
| [80;85)            | 697       | 4,035       | 17.3            | 16.0     | 18.6     |
| [85;90)            | 919       | 2,968       | 31.0            | 29.0     | 33.0     |
| [90;105)           | 674       | 1,108       | 60.8            | 56.2     | 65.4     |

Table MS6. Percentage of dementia patients treated with each type of antidepressant

| Drug         | Age group |        |        |        |        |       |        |
|--------------|-----------|--------|--------|--------|--------|-------|--------|
|              | 60-65     | 65-70  | 70-75  | 75-80  | 80-85  | 85-90 | 90-105 |
| Trazodone    | 127       | 231    | 628    | 1,449  | 2,595  | 3,837 | 3,306  |
| %            | 13.01%    | 12.99% | 14.09% | 16.01% | 17.63% | 19.9% | 22.96% |
| Mirtazapine  | 54        | 113    | 298    | 598    | 976    | 1,296 | 817    |
| %            | 5.53%     | 6.36%  | 6.69%  | 6.61%  | 6.63%  | 6.72% | 5.67%  |
| Duloxetine   | 43        | 108    | 231    | 422    | 654    | 722   | 346    |
| %            | 4.41%     | 6.07%  | 5.18%  | 4.66%  | 4.44%  | 3.74% | 2.51%  |
| Sertraline   | 36        | 98     | 258    | 520    | 889    | 1,045 | 687    |
| %            | 3.69%     | 5.51%  | 5.79%  | 5.75%  | 6.04%  | 5.42% | 4.84%  |
| Escitalopram | 103       | 159    | 403    | 885    | 1,223  | 1,371 | 835    |
| %            | 10.55%    | 8.94%  | 9.04%  | 9.78%  | 8.31%  | 7.11% | 5.84%  |

%; percentage for each age-group.
